# Supplementary material for: Comprehensive functional analysis of the PYL-PP2C-SnRK2s family in Bletilla striata reveals that BsPP2C22 and BsPP2C38 interact with BsPYLs and BsSnRK2s in response to multiple abiotic stresses
Source: PubMed Central journal article supplement (PMC9404246; doi:10.3389/fpls.2022.963069), 2022-08-11
Supplement: Data_Sheet_2.pdf [file Data_Sheet_2.pdf]

(A)

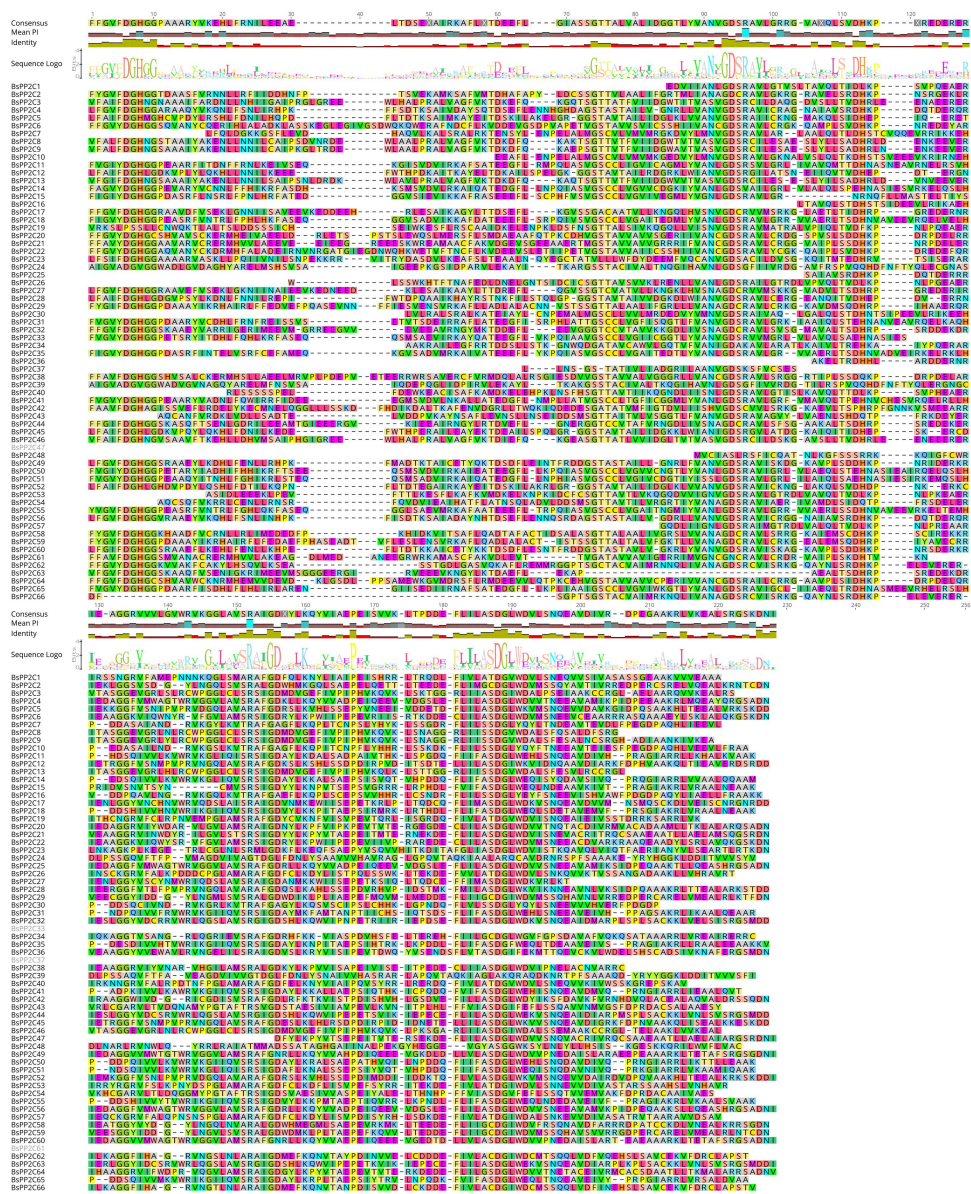

(B)

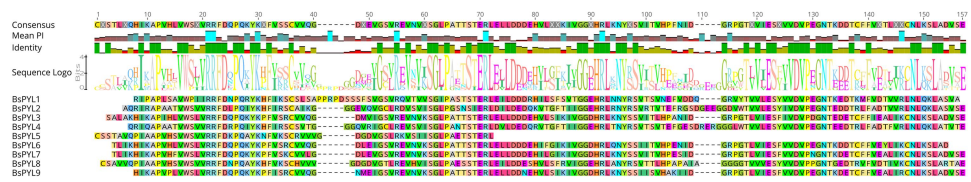

(C)

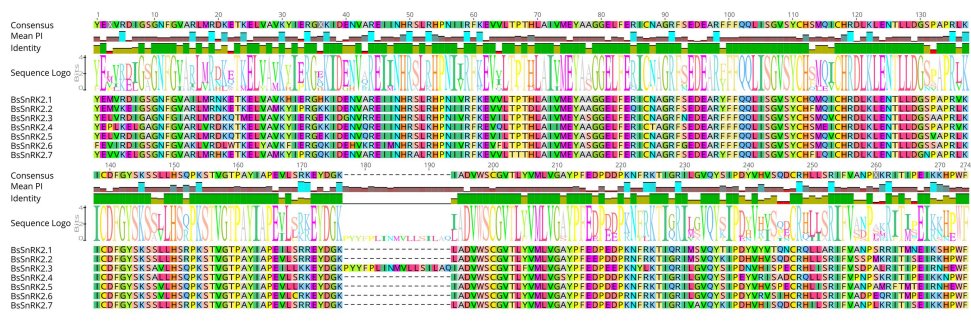

Figure S1

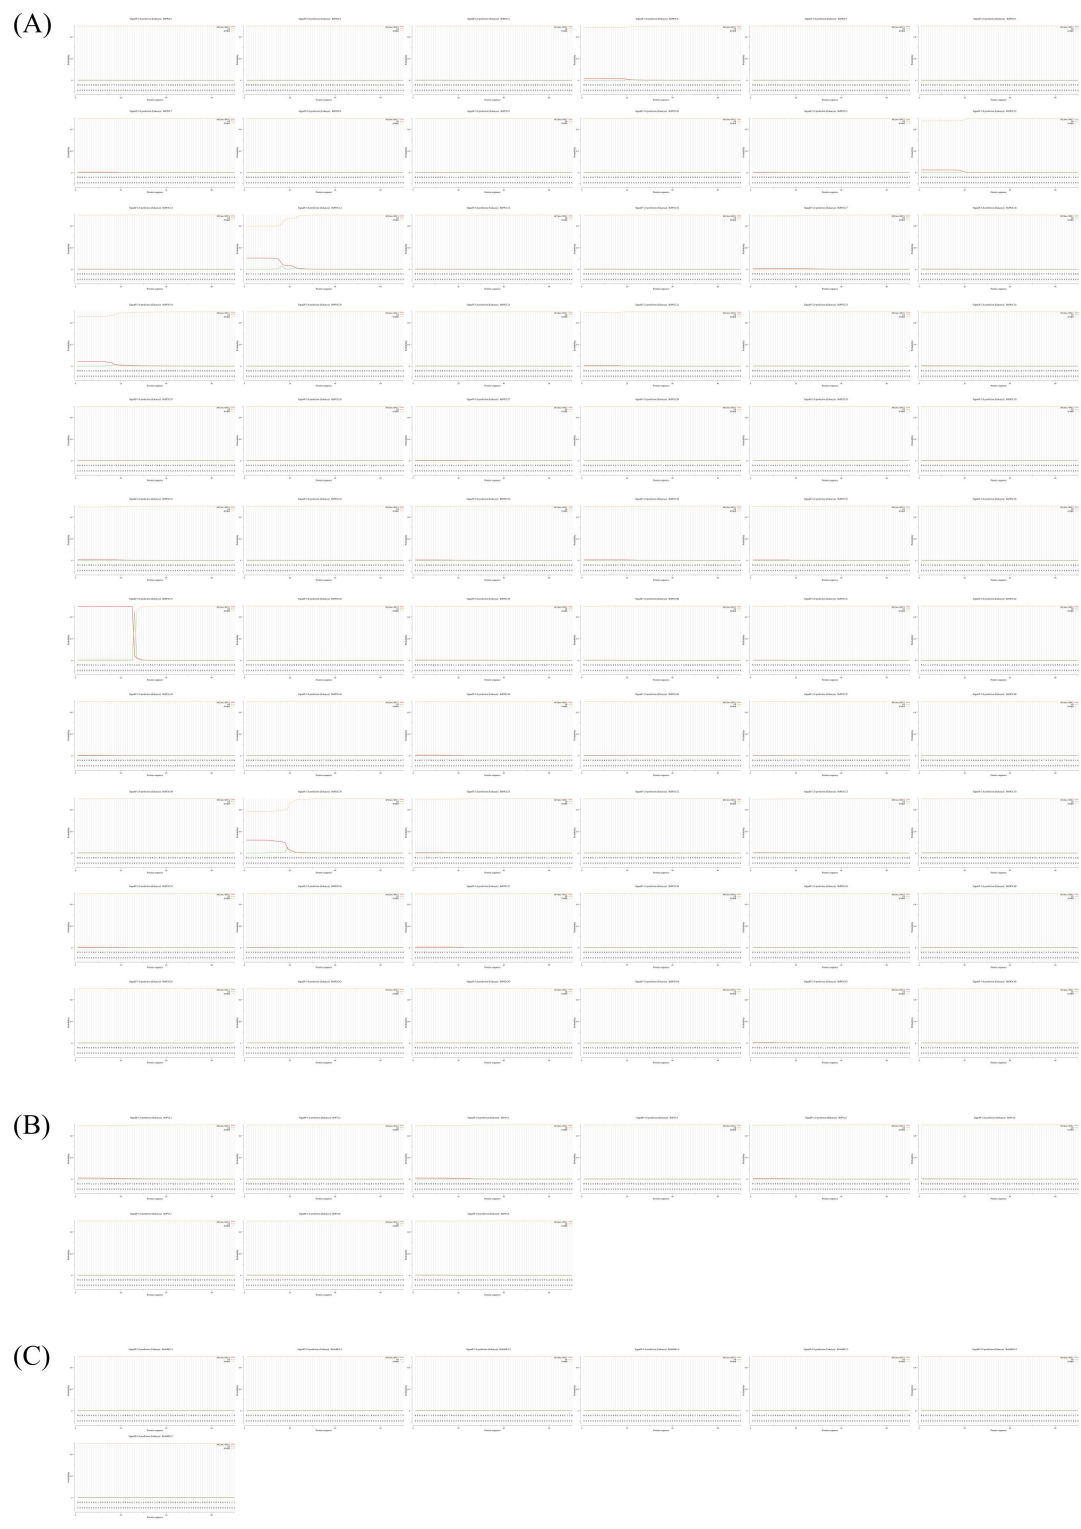

Figure S2

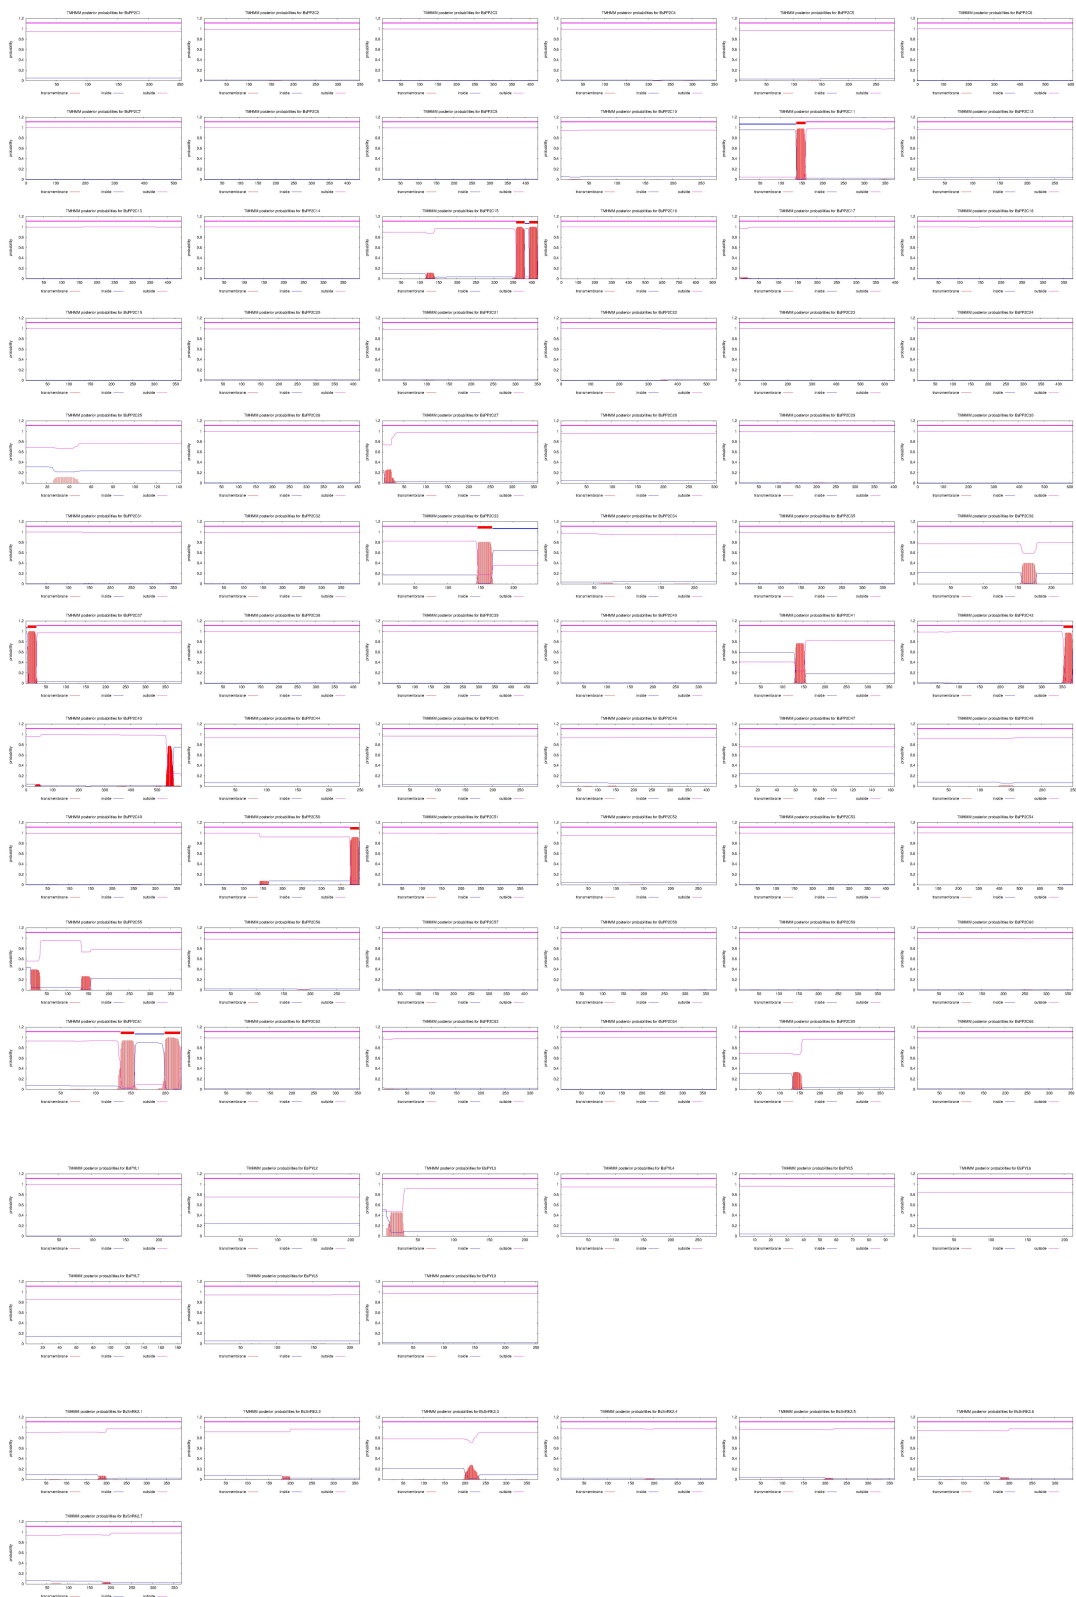

Figure S3



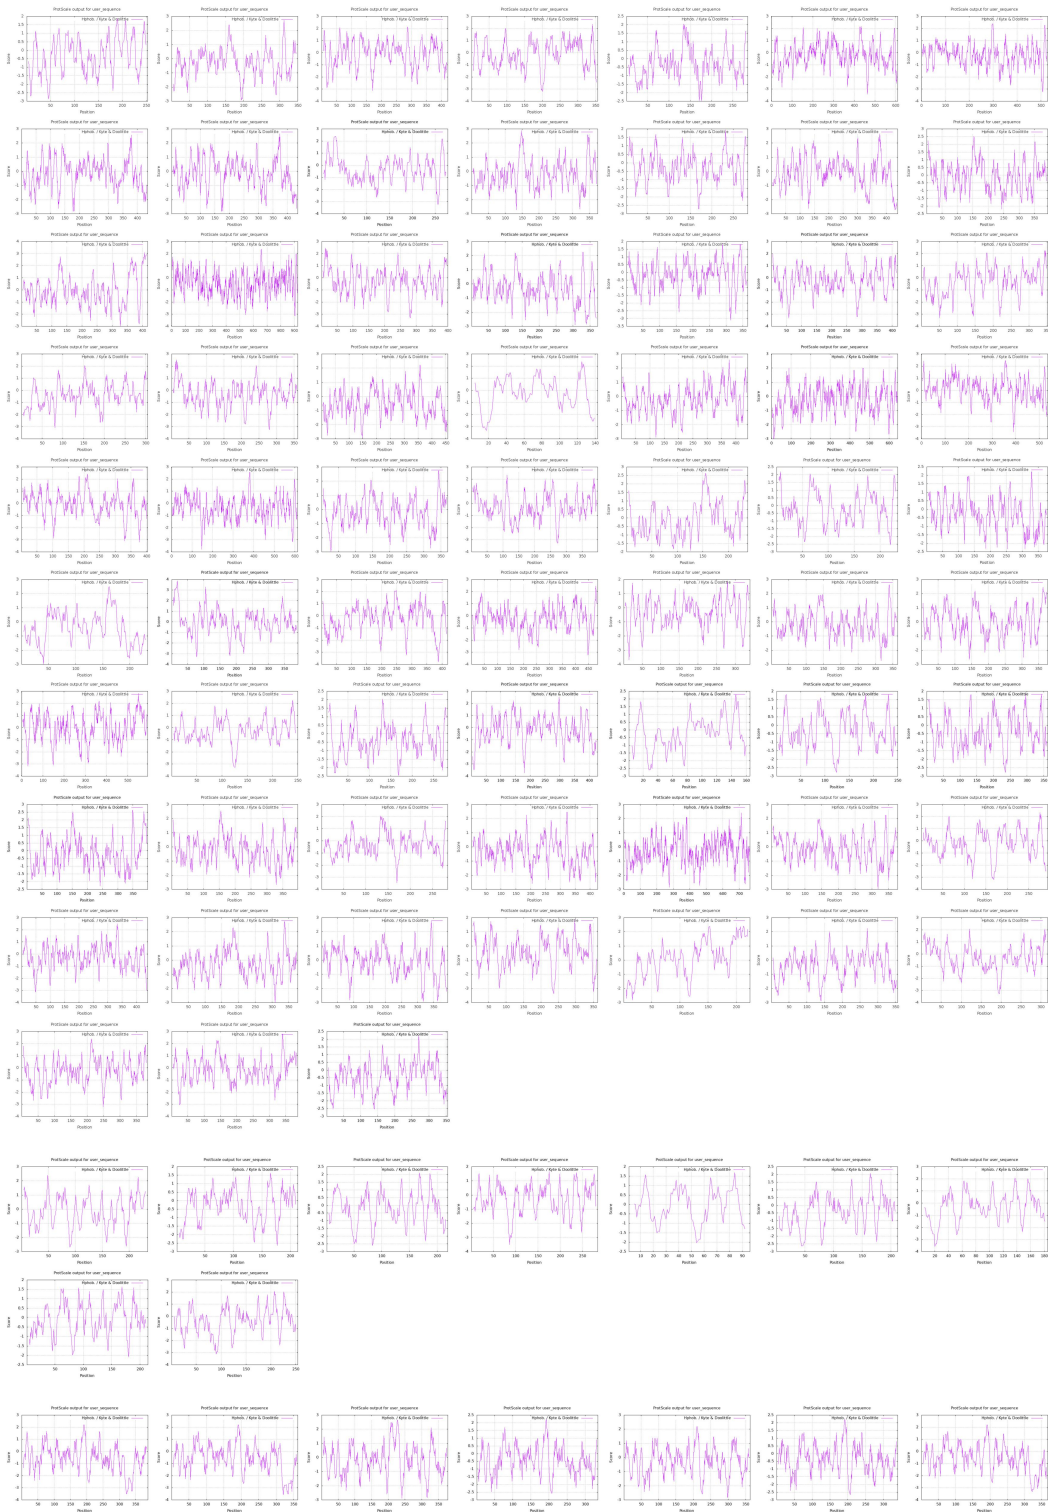

Figure S4



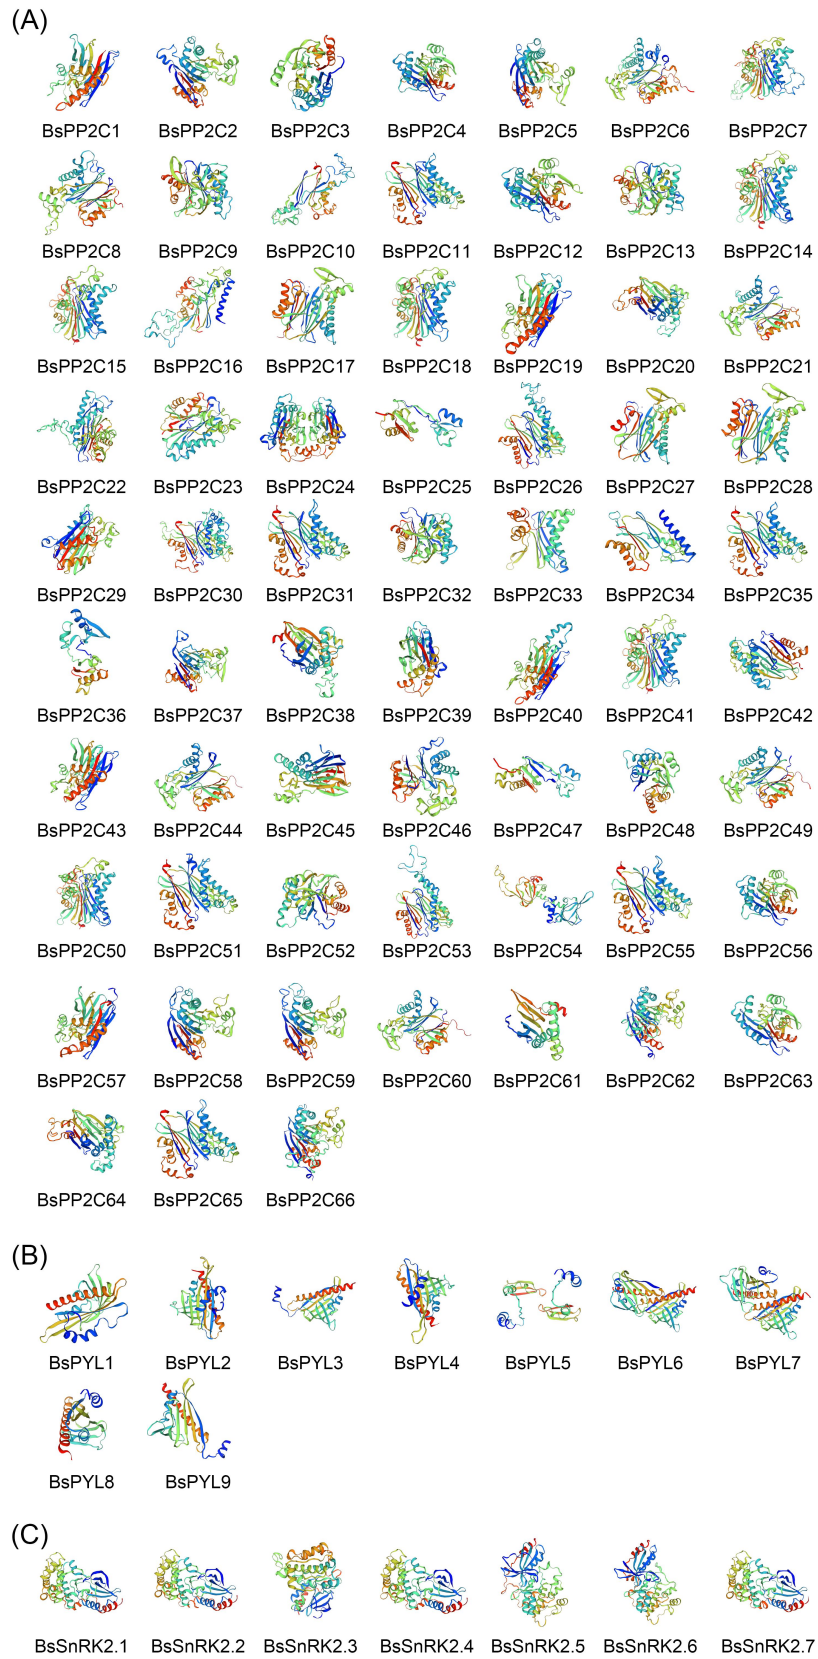

Figure S5

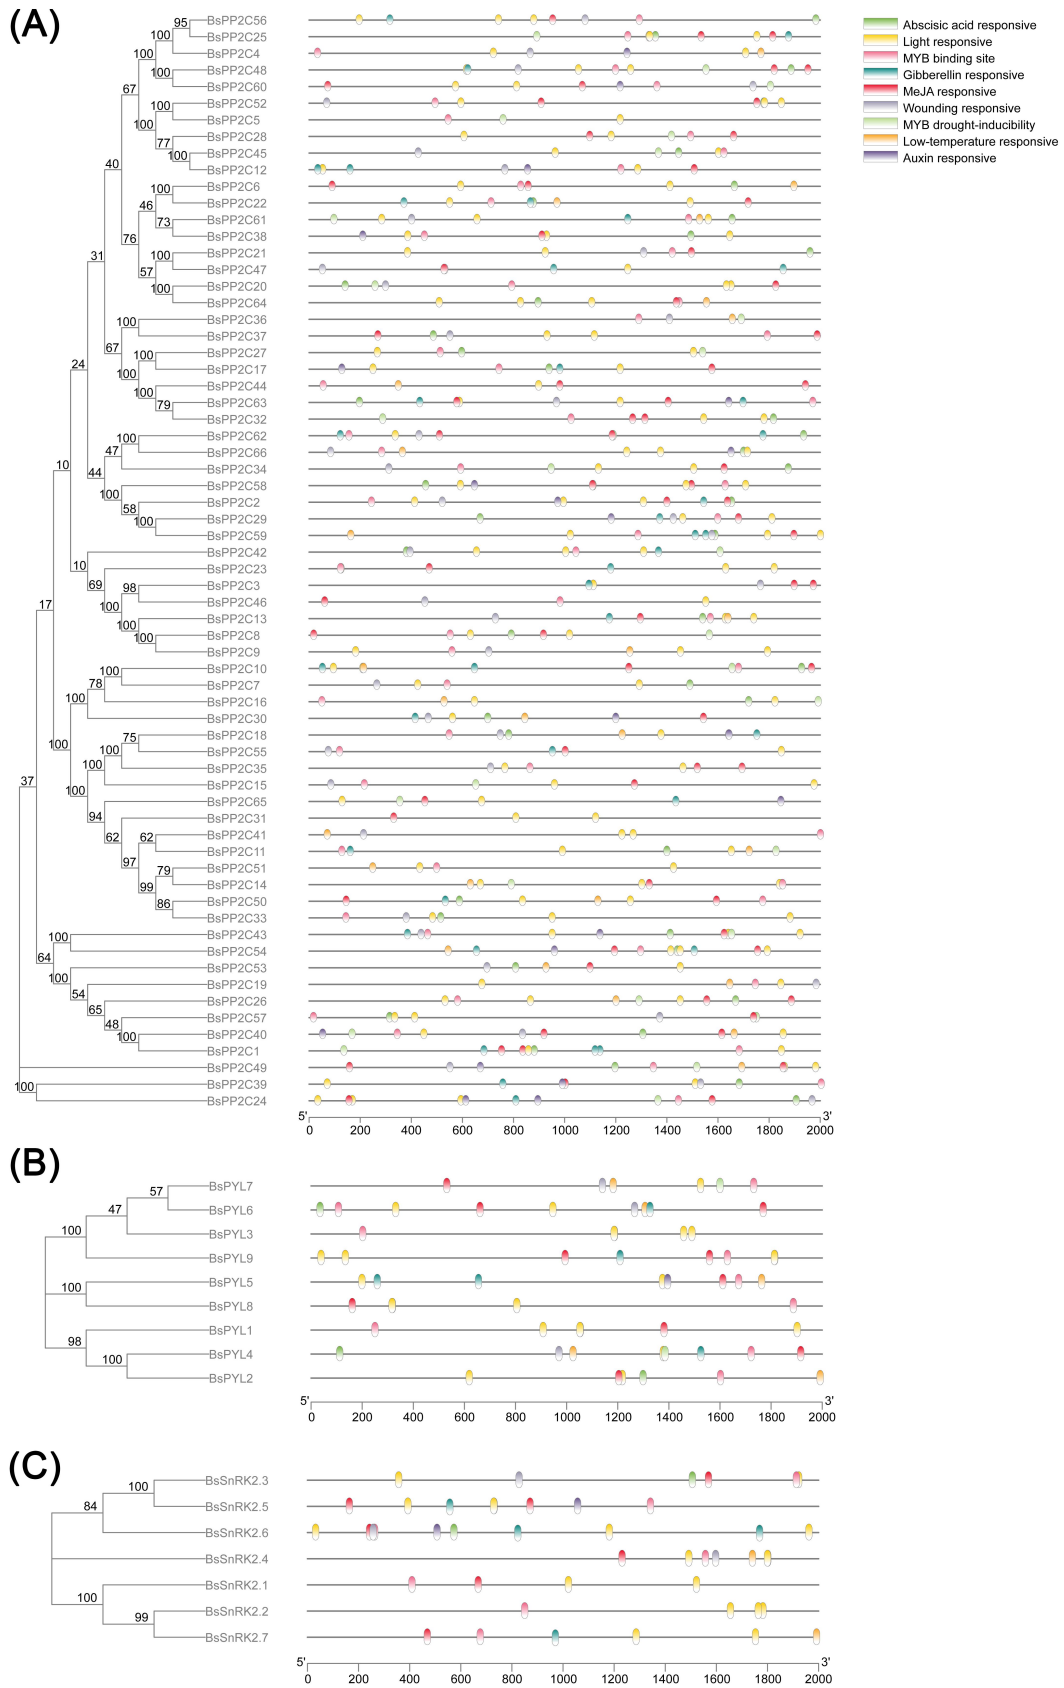

Figure S6

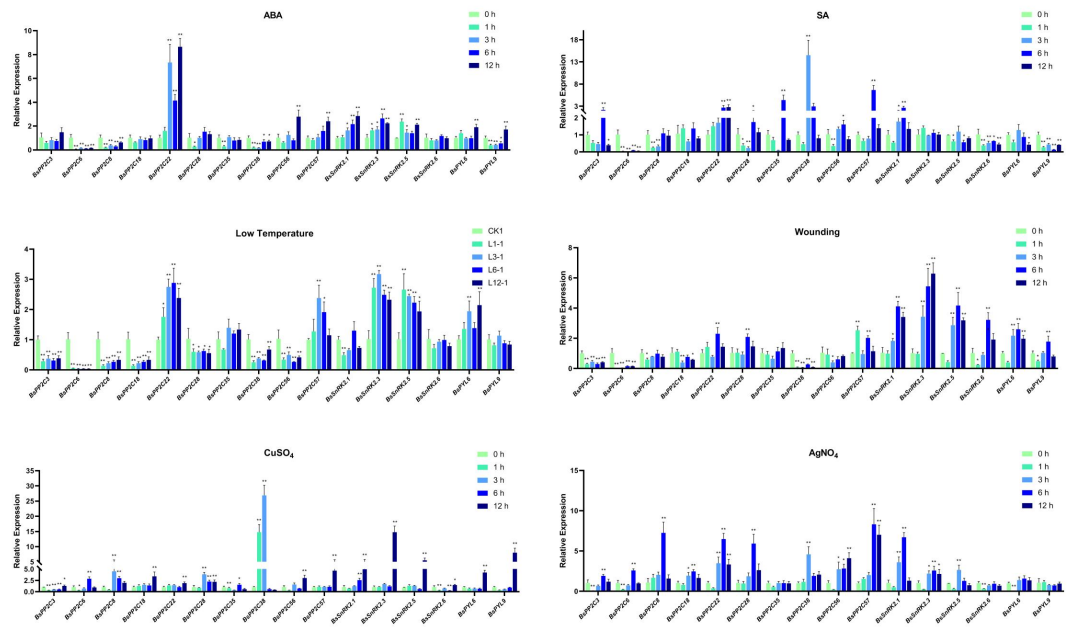

Figure S7
